# Supplementary material for: Organotypic Hippocampal Slice Cultures from Adult Tauopathy Mice and Theragnostic Evaluation of Nanomaterial Phospho-TAU Antibody-Conjugates
Source: MDPI journal article supplement (doi:10.3390/cells12101422), 2023-05-18
Supplement: s1 [file s1]

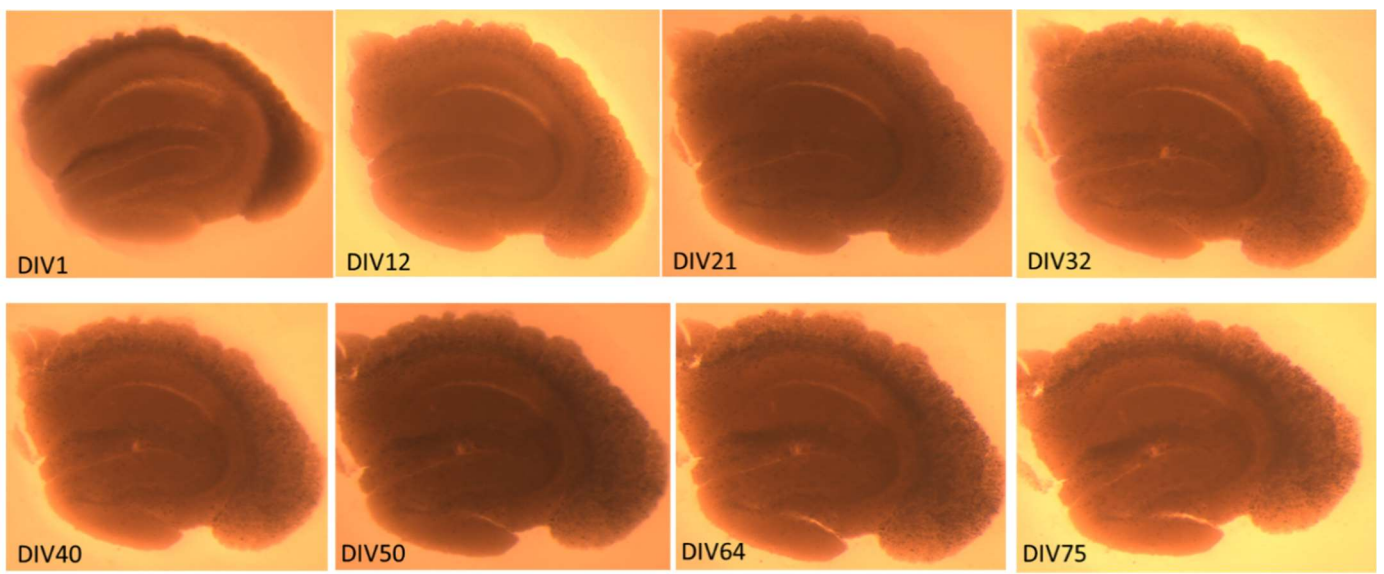

**Supplementary Figure S1.** Adult-originating mouse hippocampal slice cultured for 75 days. Hippocampal layers stay visible throughout culture. Imaged live with stereomicroscope. DIV = days *in vitro*.



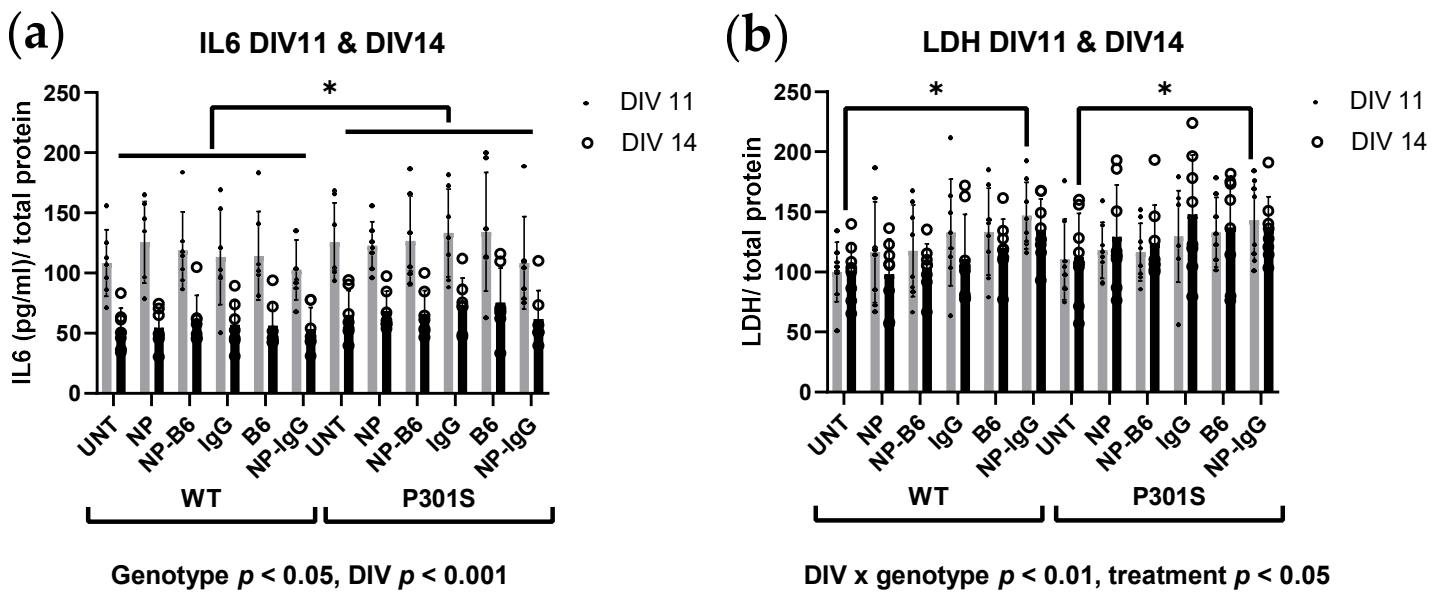

**Supplementary Figure S3.** P301S slice medium IL6 and LDH levels change during culture in different pattern as compared to wildtypes (WT). **(a)** IL6 levels in relation to total protein content at DIV11 and DIV14. IL6 levels decreased during culture and P301S levels were higher at both timepoints. **(b)** LDH levels at DIV11 and DIV14. In WT medium LDH levels decreased from DIV11 to DIV14 whereas in P301S medium LDH levels increases. Mean  $\pm$  SD, individual data points correspond to samples from individual wells,  $n = 7-8$ . ANOVA,  $*p < 0.05$ , Bonferroni. Key: UNT = Untreated, NP = Nanoparticle, NP-B6 = nanoparticle-B6 antibody conjugate, IgG = immunoglobulin G, B6 = anti pTAU antibody, NP-IgG = nanoparticle-immunoglobulin G conjugate, P301S = transgenic hTAU.P301S mice slices, DIV = days *in vitro*.

(a)

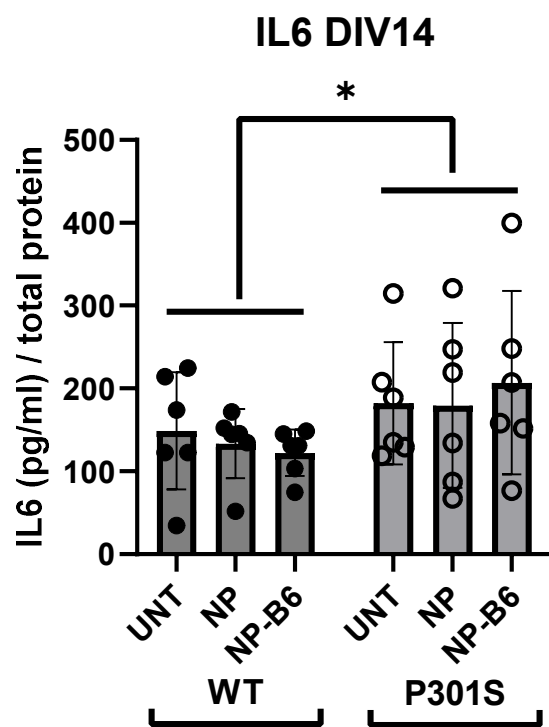

(b)

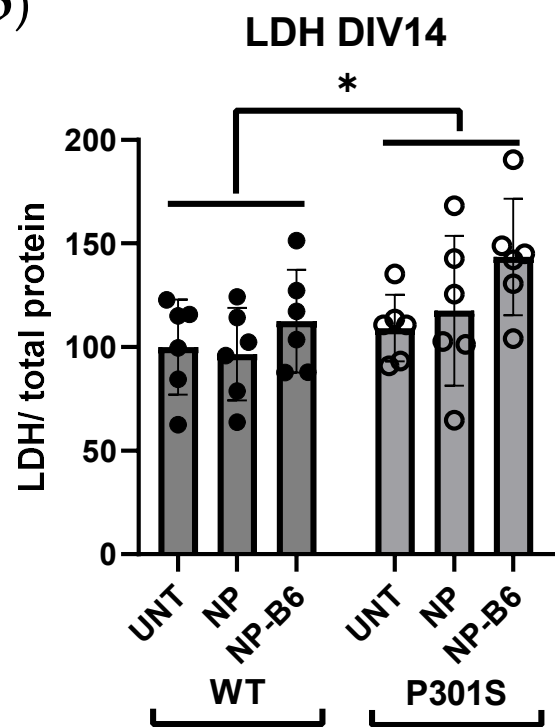

**Supplementary Figure S4.** P301S slice medium IL6 and LDH levels increased compared to wildtypes (WT) also in experiment 1. **(a)** IL6 levels in relation to total protein content at DIV14. **(b)** LDH levels at DIV14. Mean  $\pm$  SD, individual data points correspond to samples from individual wells,  $n = 6$ . \*  $p < 0.05$ , two-way ANOVA. Key: UNT = Untreated, NP = Nanoparticle, NP-B6 = nanoparticle-B6 antibody conjugate, P301S = transgenic hTAU.P301S mice slices, DIV = days *in vitro*.

## pTAU difference after Mg separation

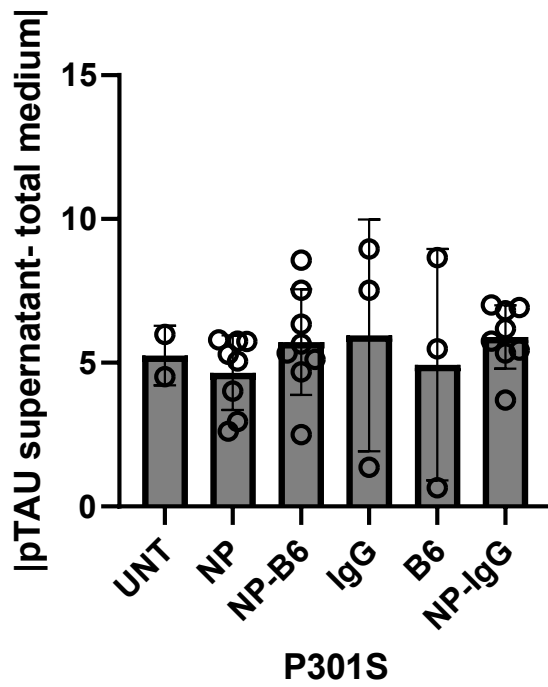

**Supplementary Figure S5.** Extracellular target engagement to pTAU remains inconclusive for both nanomaterial- B6 conjugates tested in slice culture setting. Difference in pTAU levels between total medium and supernatant in experiment 2. Mean  $\pm$  SD, individual data points correspond to samples from individual wells, n = 2-8. Key: UNT = Untreated, NP = Nanoparticle, NP-B6 = nanoparticle-B6 antibody conjugate, IgG = immunoglobulin G, B6 = anti pTAU antibody, Mg = magnetic, P301S = transgenic hTAU.P301S mice slices.
